# Supplementary material for: An abundant class of non-coding DNA can prevent stochastic gene silencing in the C. elegans germline
Source: PubMed Central journal article supplement — Cell. Author manuscript; Available in PMC 2017 Jul 14. (PMC4947018; doi:10.1016/j.cell.2016.05.072), 2016-06-30

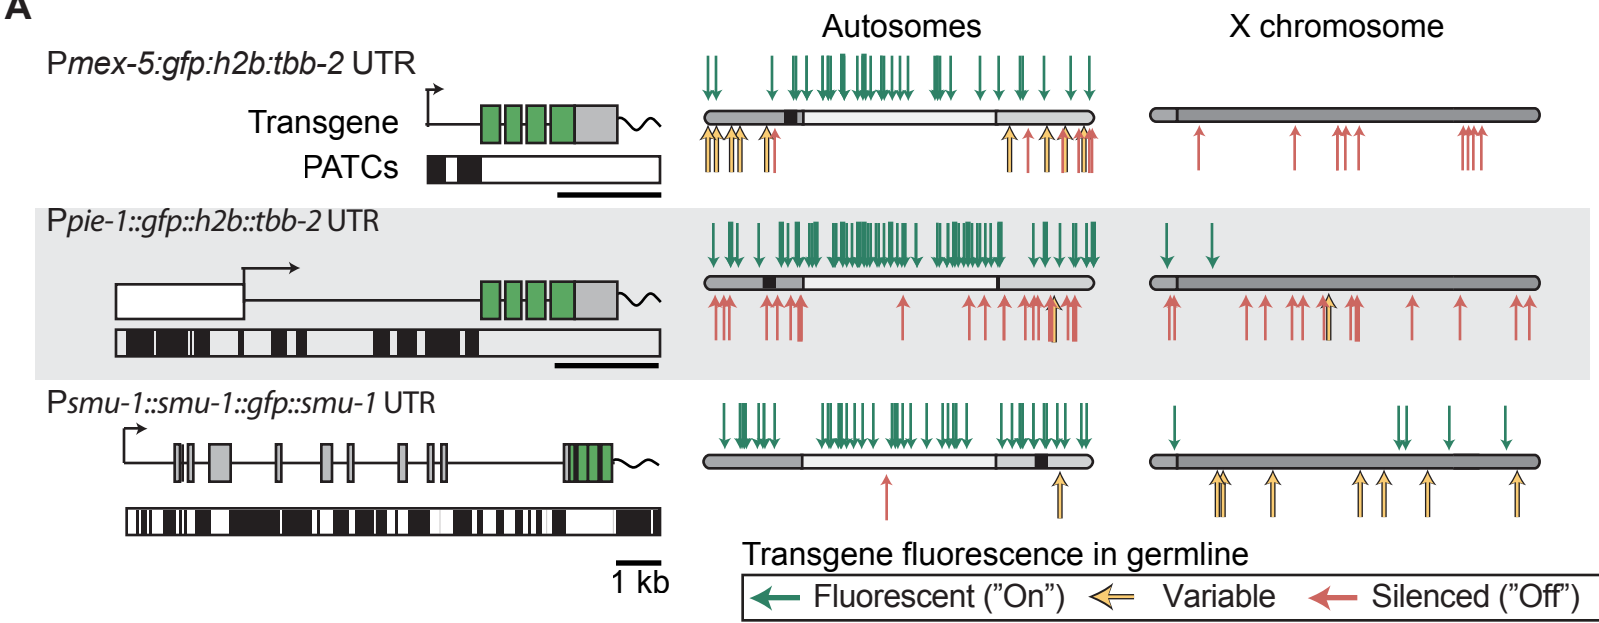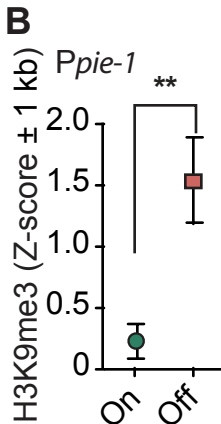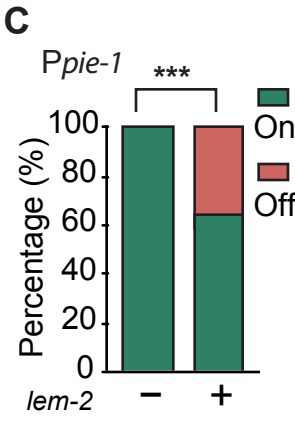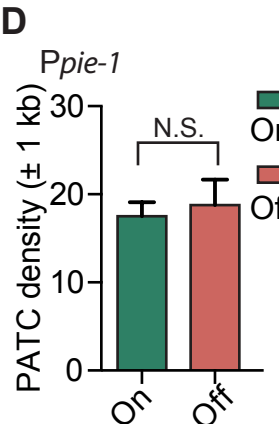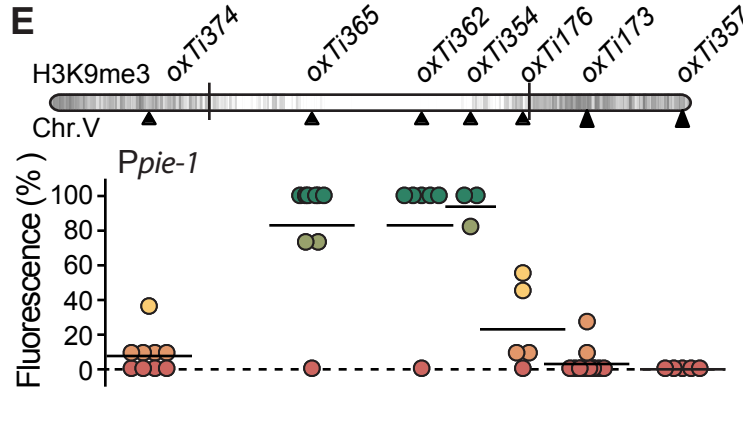

**F**

Periodic A<sub>n</sub>/T<sub>n</sub> Clusters (PATCs) in *smu-2* intron

~10bp ~10bp ~10bp ~10bp

```

1 AAAAAtcgataTTTTgagcgaAAAAAgccggAAAAAtggaTTTTatcgga
51 gtcAAAattgttAAAAAactgcAAAAATTgccAAAAAAGcaTTTTTat
101 tAAAATTTTgaTTTTTTTgagctgagAAAatgccTTTTatagacgaaTTTcctt
151 aTTTTTTTTTtacAAAAAActccacAAAAAtggcAAAAATTgactAAAAA
201 gccaaTTTTTgtcgtTTTTTctccgtgccacagcgccgAAAAatcgaTTTTT
251 agcgaTTTTTcgggtgAAAAagtgtAAAAaccgactgAAAAaccagctgAA
301 AACgacAAAAAacggtgtaagTTTTtagctaaTTTcaccTTTTTTCgataTT
351 TTTTTtactAAAAAACCgAAAAattgagTTTTTTCaAAATTTctgCAA
401 AAAattctgcaaTTTTtagcaaTTTccataactTTTTgacgcccAAAAagct
451 tAAAAatagatTTTTTtagaggTTTTTaatggAAAAttcatggaTTTTTCA
501 AATTTTTccacgAAAAtcattgAAAAATTgAAAAAattgaTTTcctatt
551 cAAAgttctagctAAAAactgcaaTTTTtagcaaTTTccataactTTTTag
601 tactgAAAAAacctaAAAAatgtgaTTTTcagaggaTTTcaatggAAAAat
651 catggaTTTTTccaaTTTTTcaatgAAAAccattgAAAAaccctggAAAA
701 ttgagTTTTTcttCAAAGTTTtaggAAATTTatgagaaTTTTTgaatAAAA
751 AATTTTTAAATTTgAAAAAattgAAATTTTaatctAAATTTTAAAGAA
801 AgttgTTTTTTTaatgTTTTTTTTTTTtgaatAAAAAATAAacTTTTc
851 TTTAAAAATTTagaattAAAATTTTcaaTTTTTTtatcAAAAttctcAtA
901 AATTTcgtAAATTTaatAAAAactcaaTTTTTccgTTTTTTTCgatg
951 aTTTTTcactAAAAAattggAAAAattcatcaaTTTTcattgAAAAcctc
  
```

Bases with PATC > 60 = 985 = 98.5%  
 Total sum of PATC score = 726,116  
 PATC density = 726

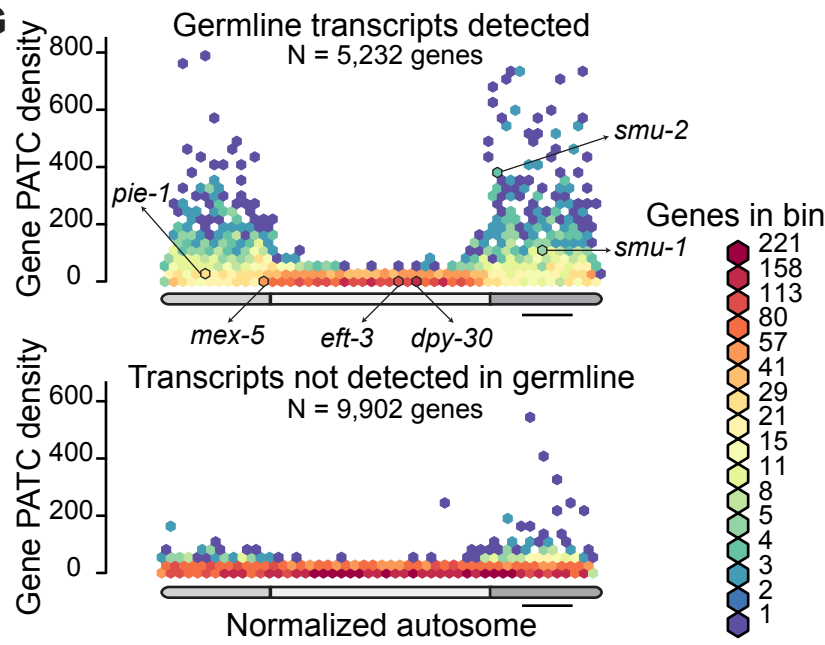

Supplement: NIHMS792102-supplement-6.pdf [file NIHMS792102-supplement-6.pdf]
