# Supplementary material for: An abundant class of non-coding DNA can prevent stochastic gene silencing in the C. elegans germline
Source: PubMed Central journal article supplement — Cell. Author manuscript; Available in PMC 2017 Jul 14. (PMC4947018; doi:10.1016/j.cell.2016.05.072), 2016-06-30
Supplement: NIHMS792102-supplement-16.pdf [file NIHMS792102-supplement-16.pdf]

Decreased G/C content

**EMS mutagenesis**

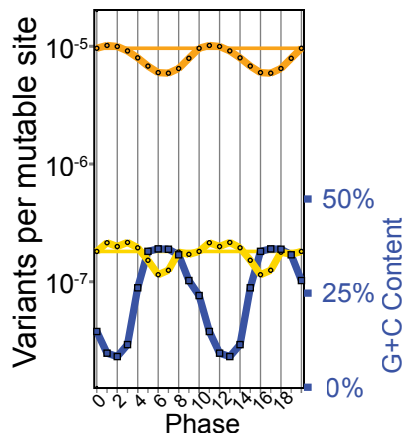

Neutral G/C content

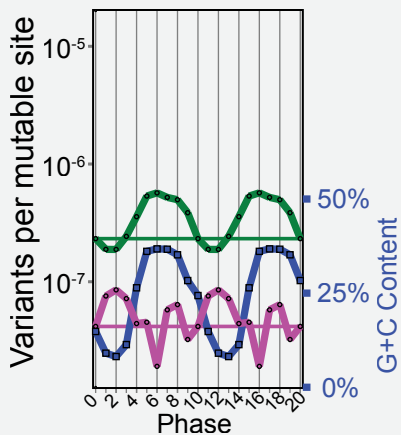

Increased G/C content

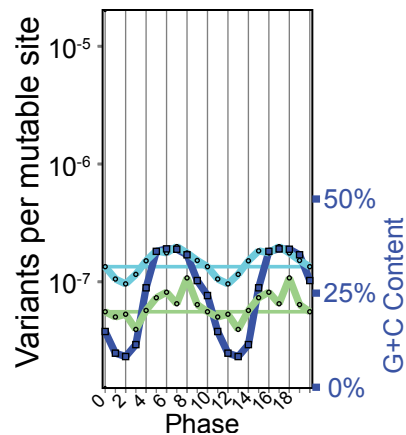

**Natural mutations**

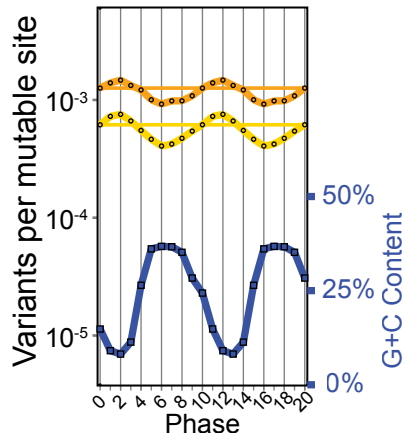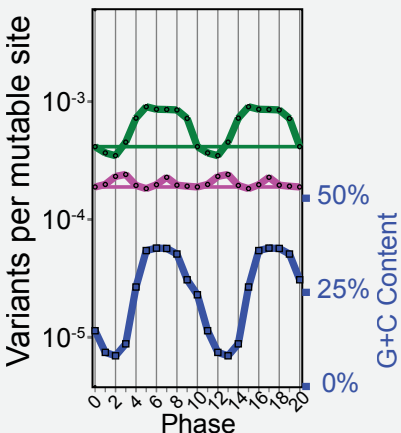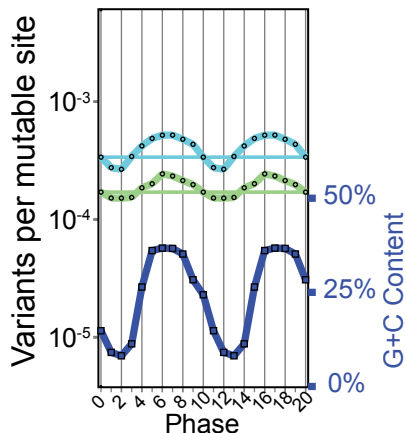

**ENU mutagenesis**

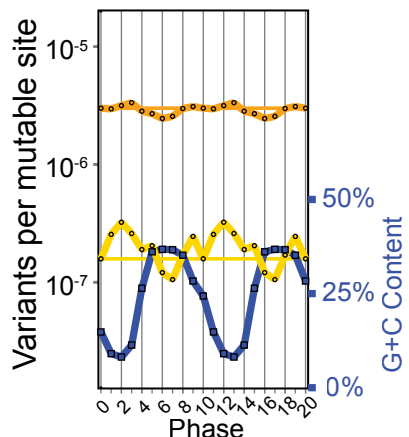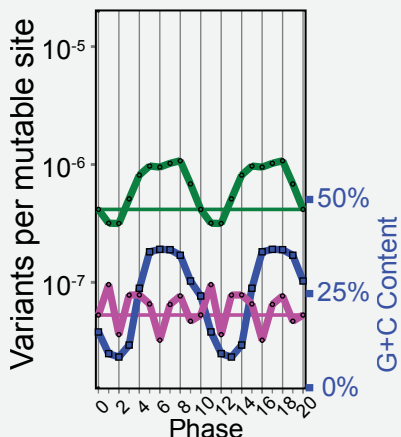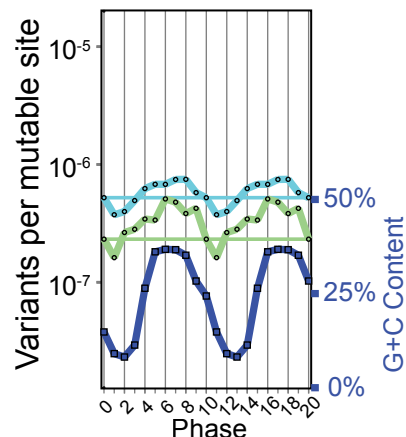

**EMS/ENU mutagenesis**

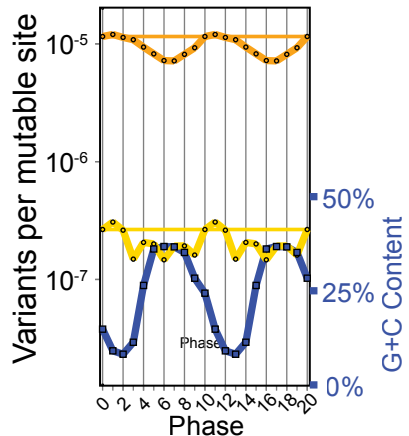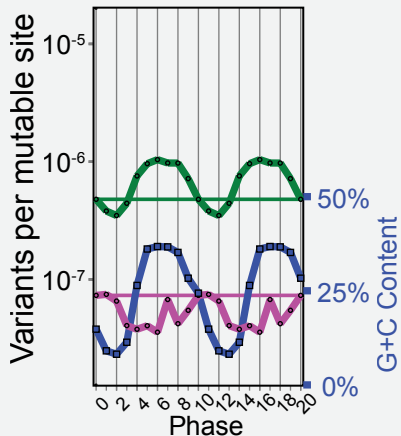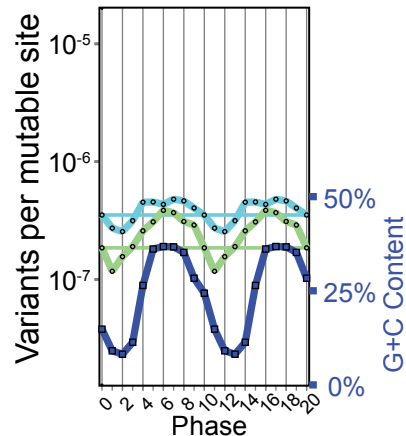

- G → T & C → A
- G → A & C → T

- G → C & C → G
- A → T & T → A

- A → G & T → C
- A → C & T → G
