# Supplementary figures and images for: An abundant class of non-coding DNA can prevent stochastic gene silencing in the C. elegans germline
Source: PubMed Central journal article supplement — Cell. Author manuscript; Available in PMC 2017 Jul 14. (PMC4947018; doi:10.1016/j.cell.2016.05.072), 2016-06-30

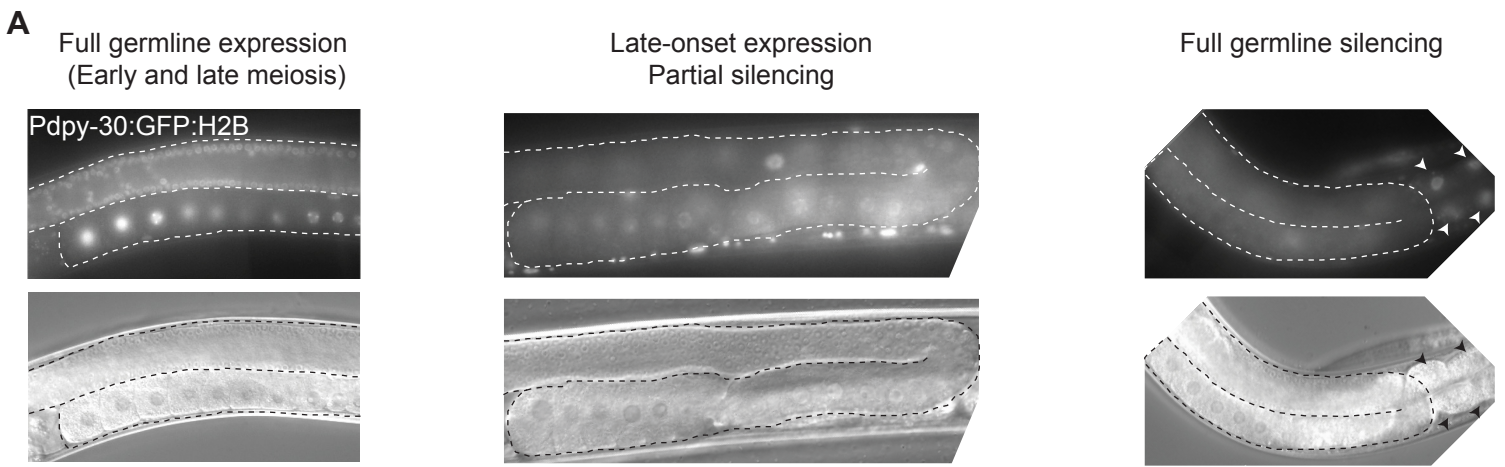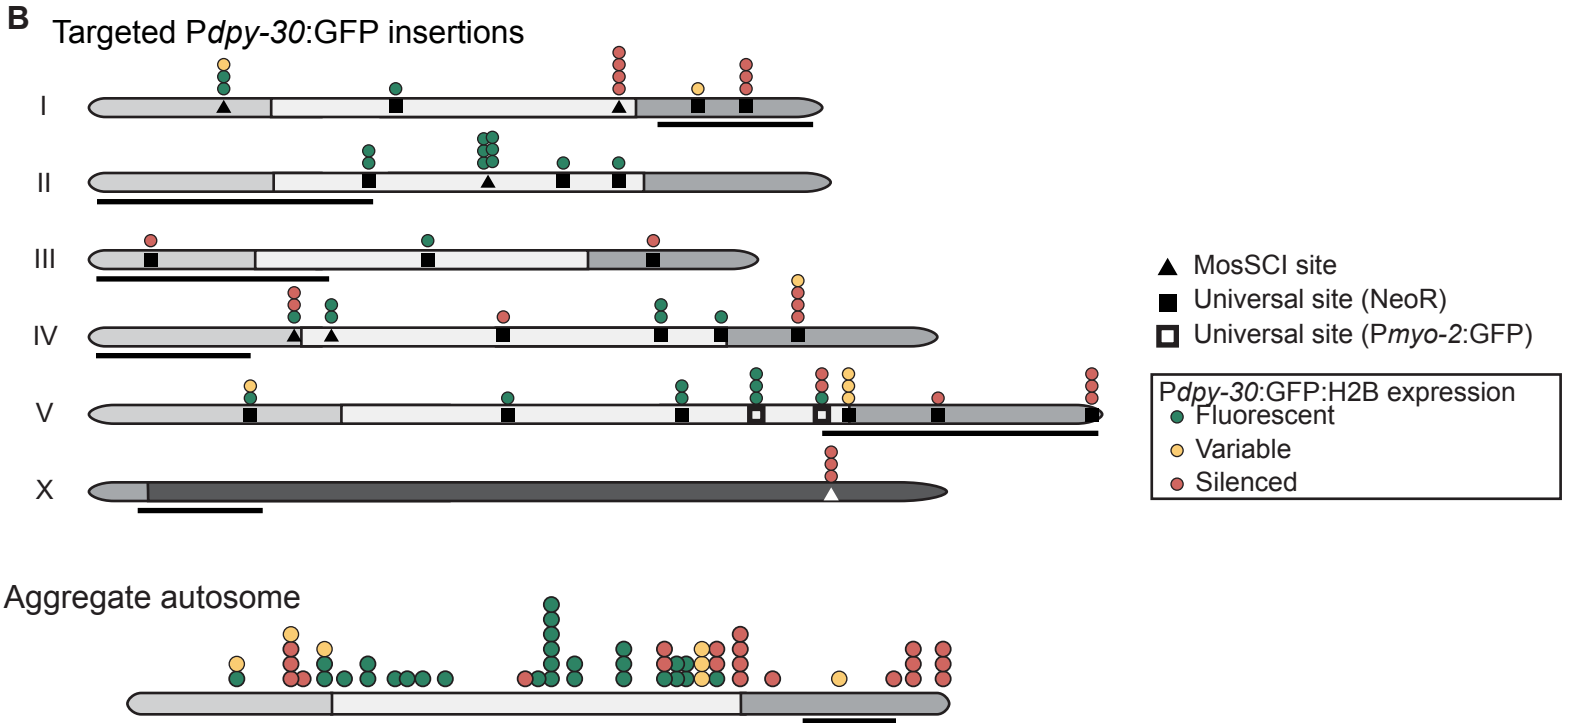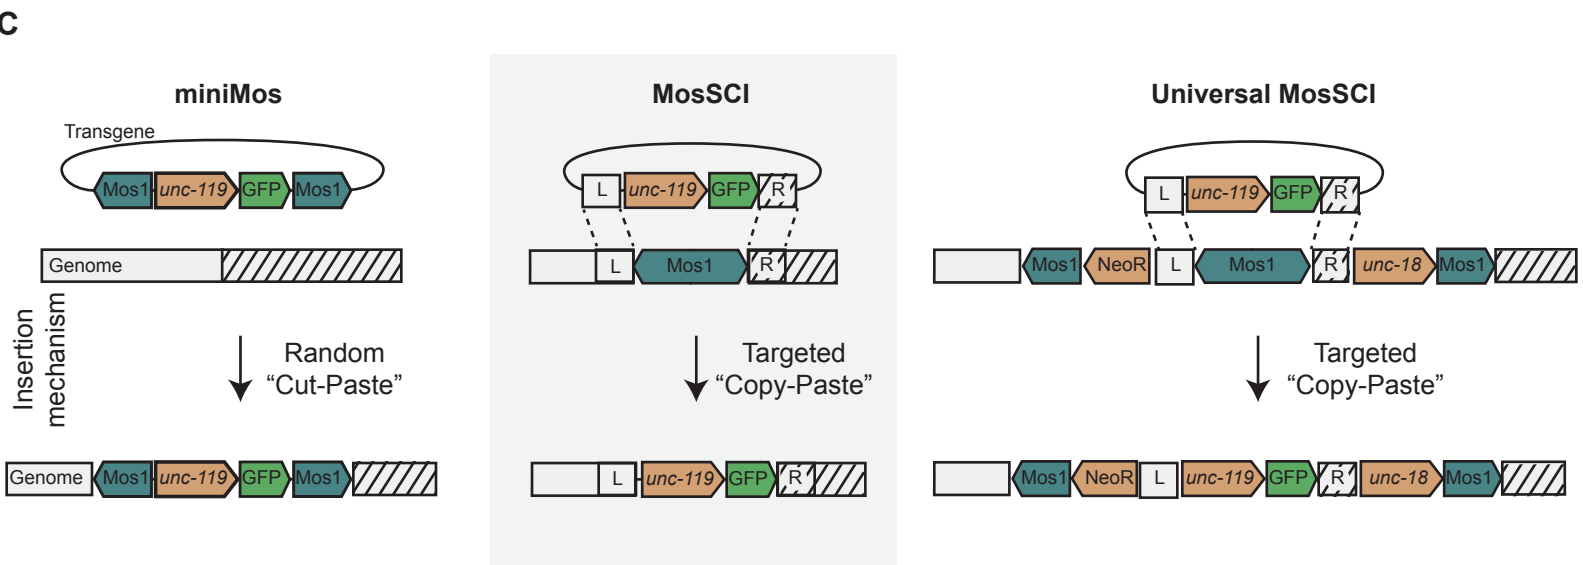

Supplement: NIHMS792102-supplement-10.pdf [file NIHMS792102-supplement-10.pdf]

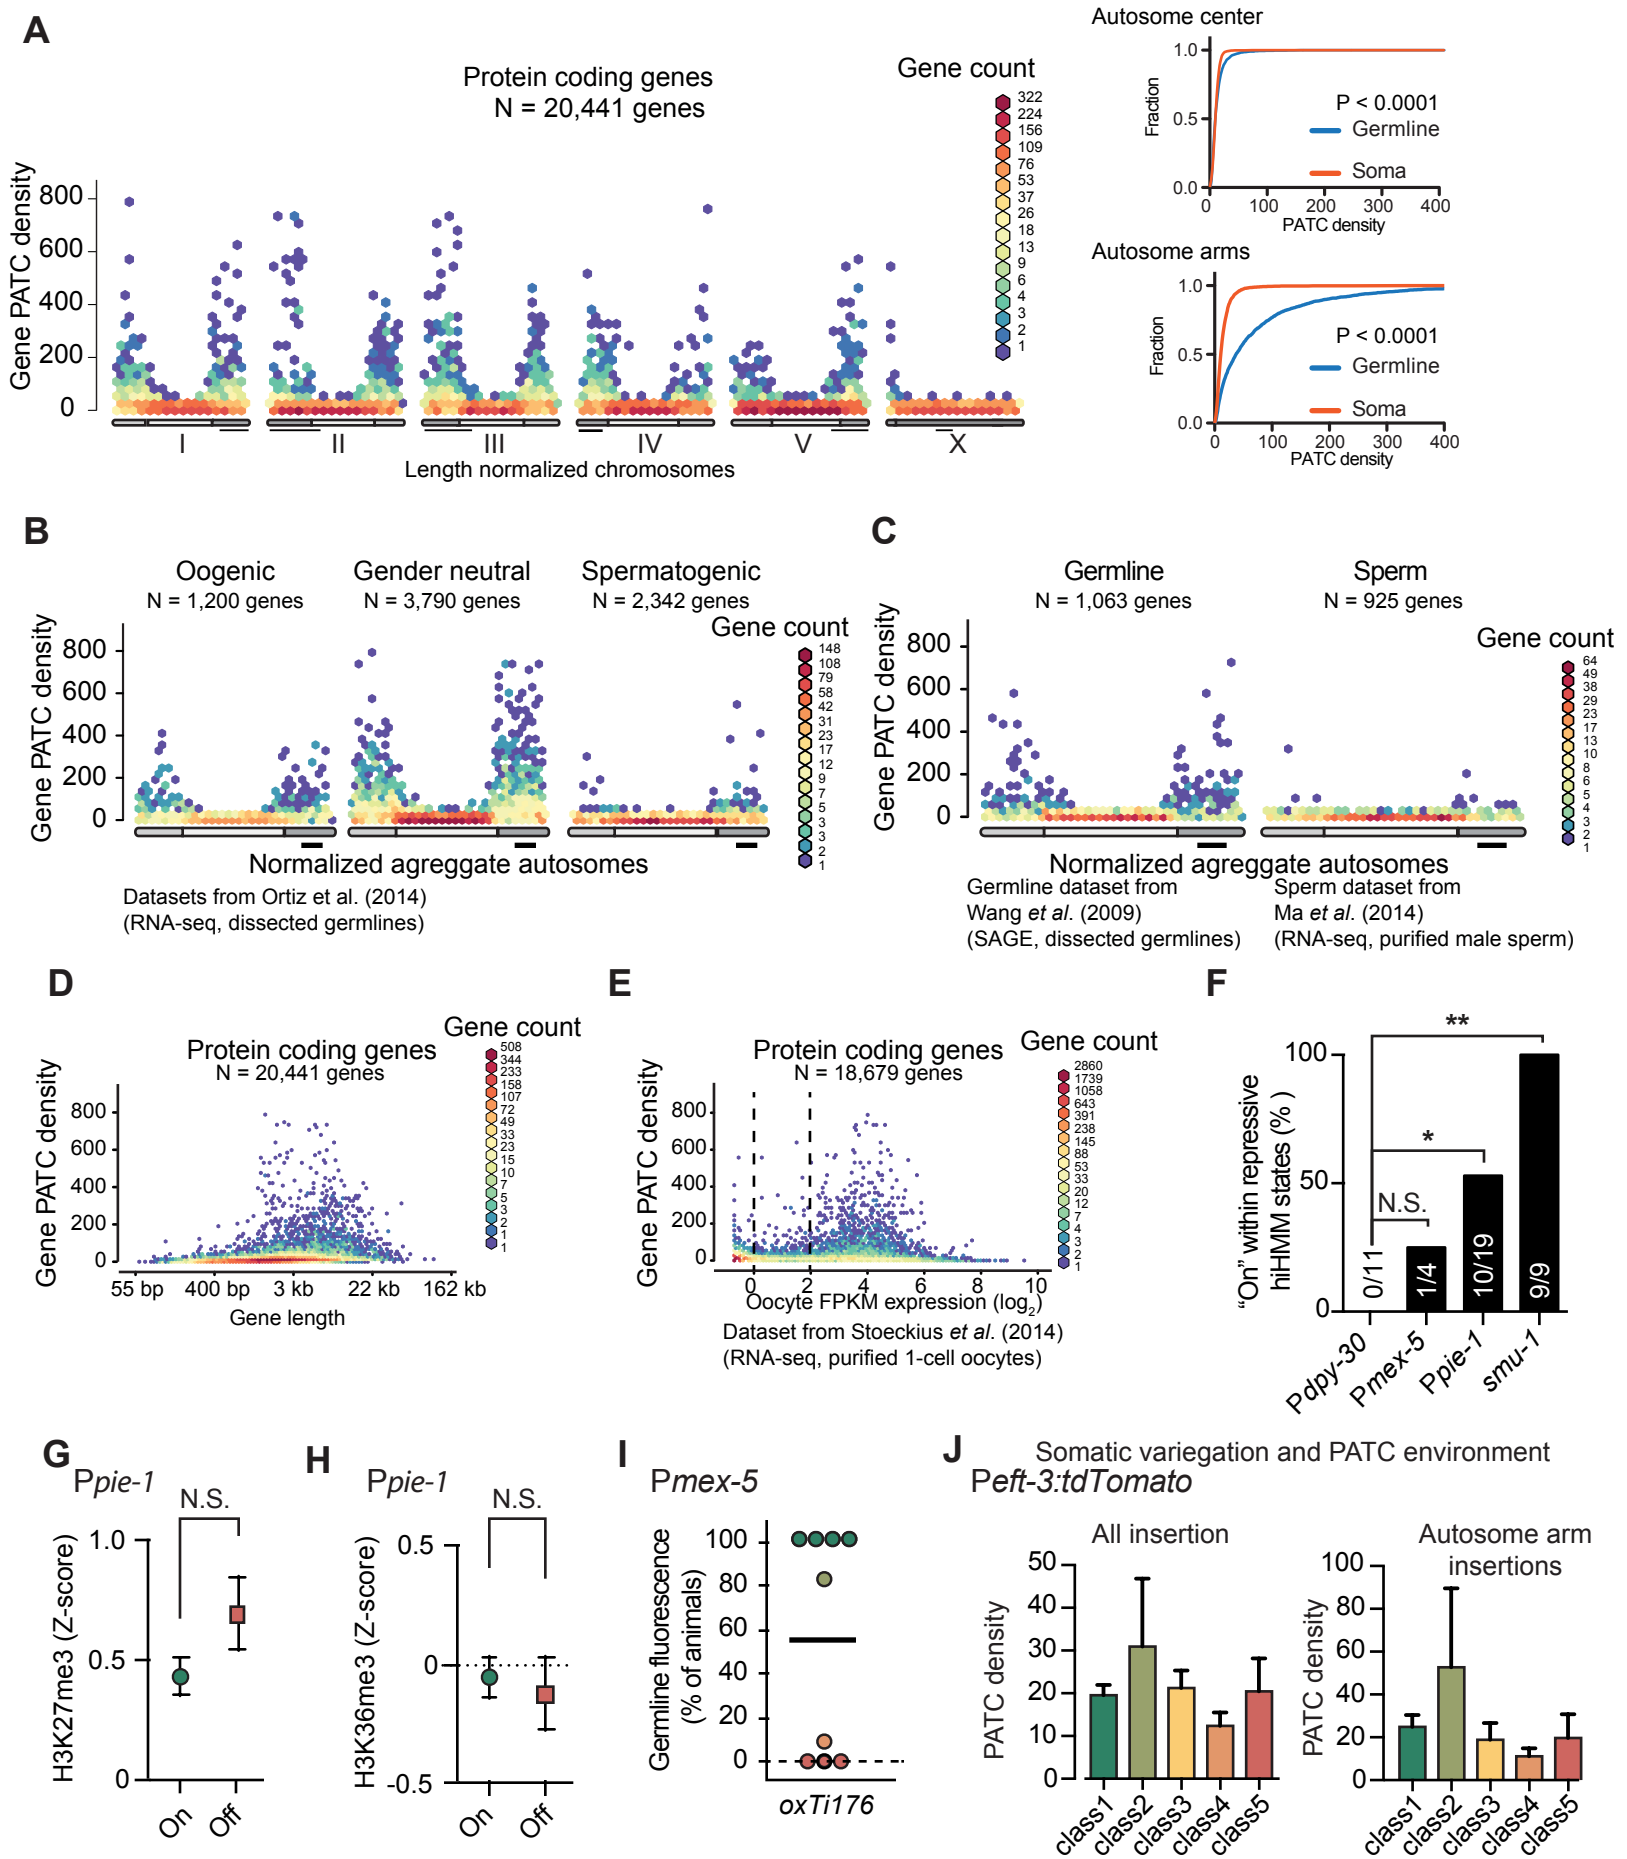

Supplement: NIHMS792102-supplement-12.pdf [file NIHMS792102-supplement-12.pdf]

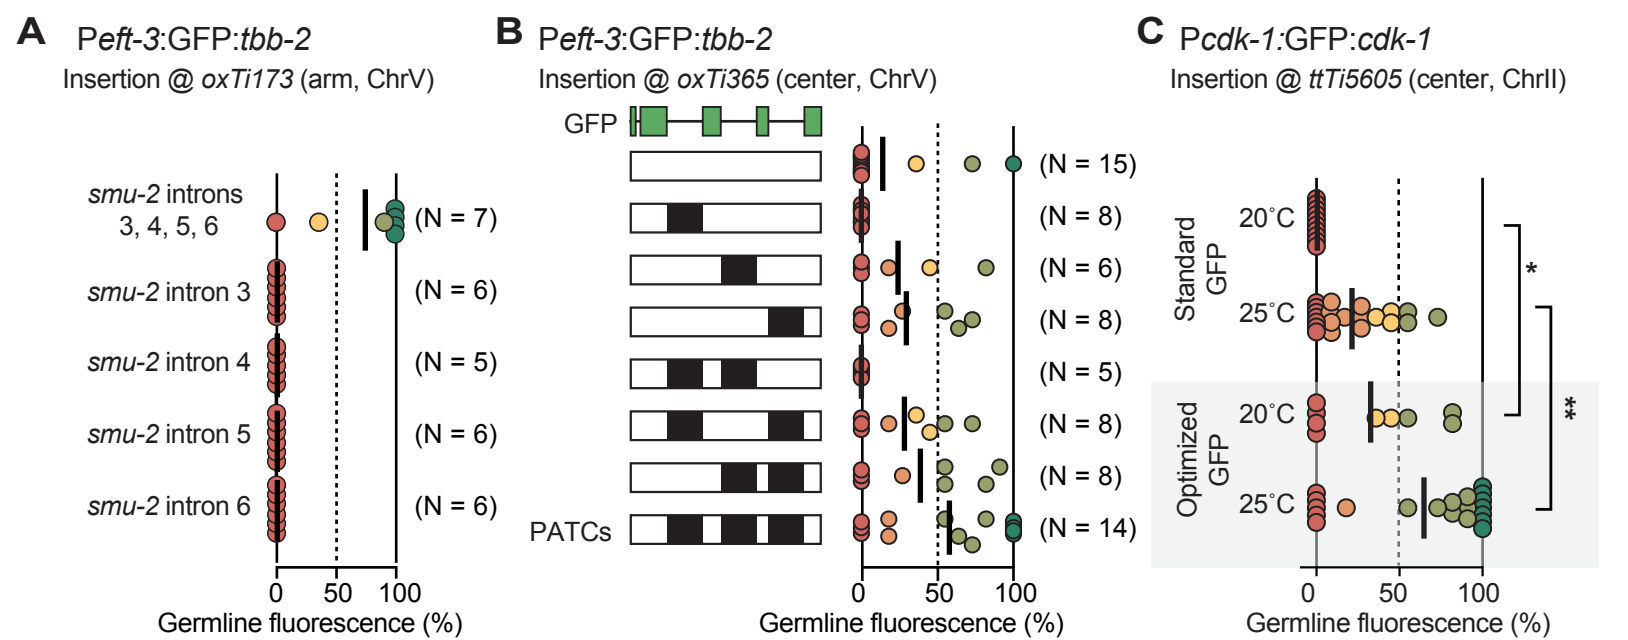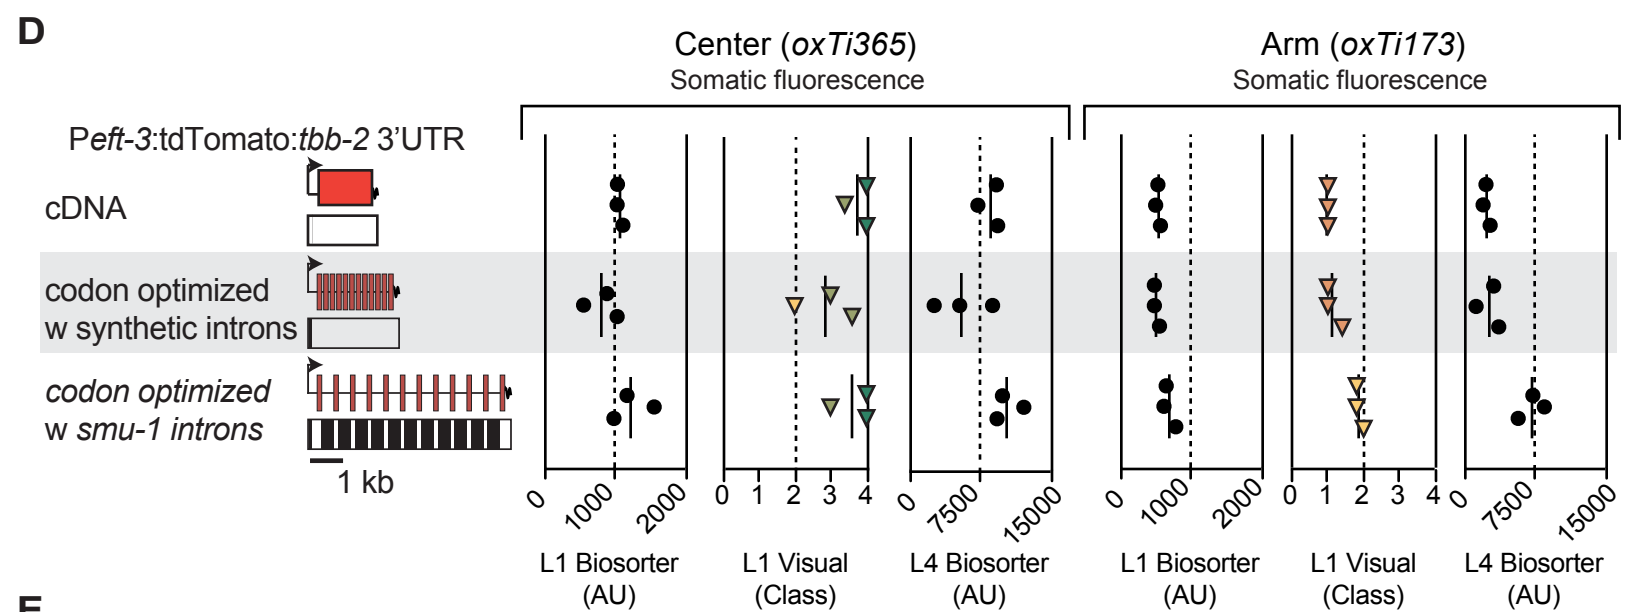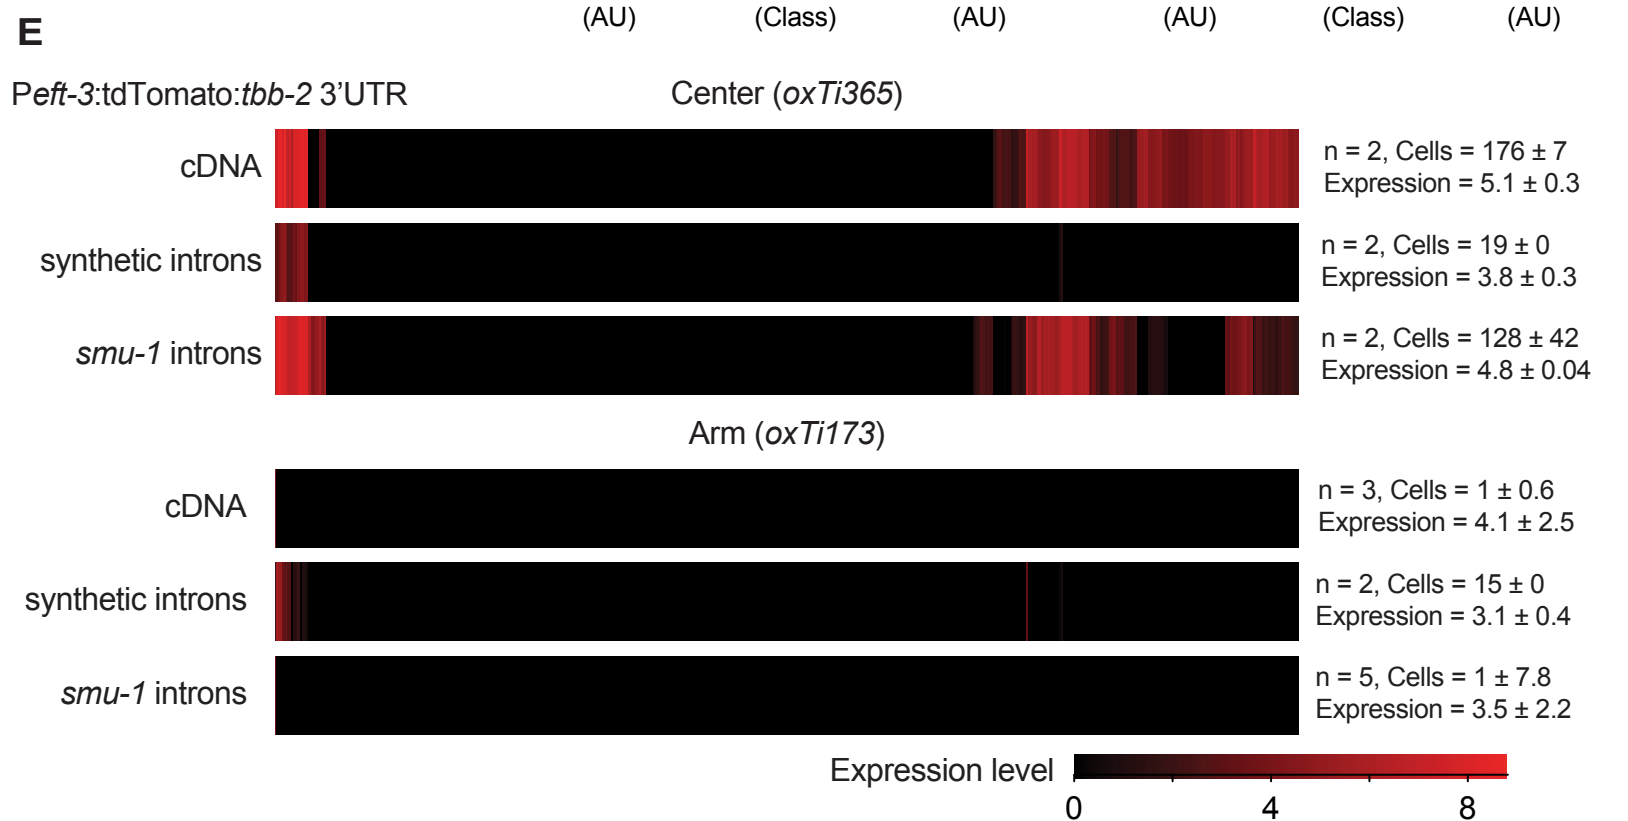

Supplement: NIHMS792102-supplement-13.pdf [file NIHMS792102-supplement-13.pdf]

**A** PD1537 - GFP expressed in germline

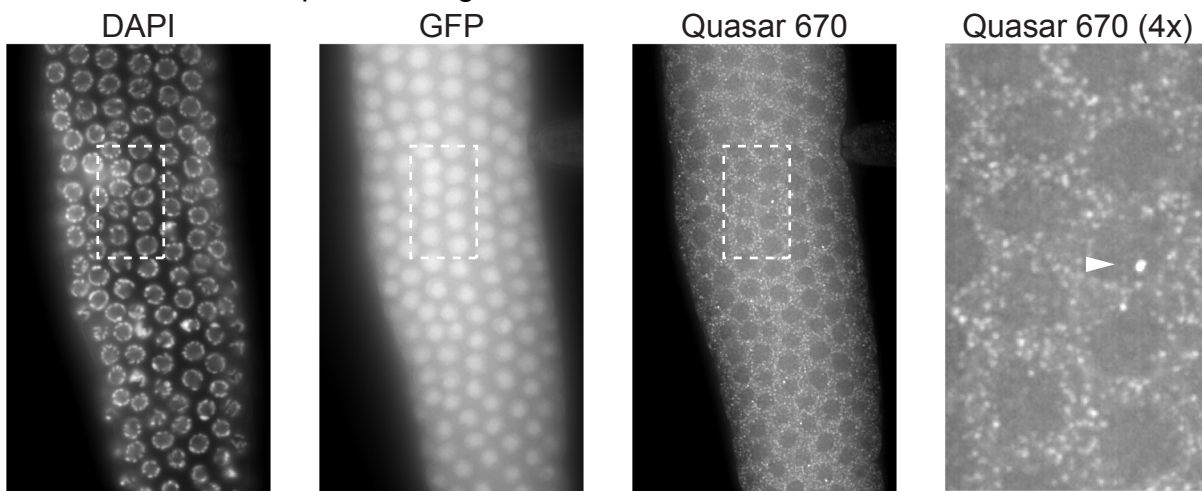

**B** PD1540 - GFP silenced in germline

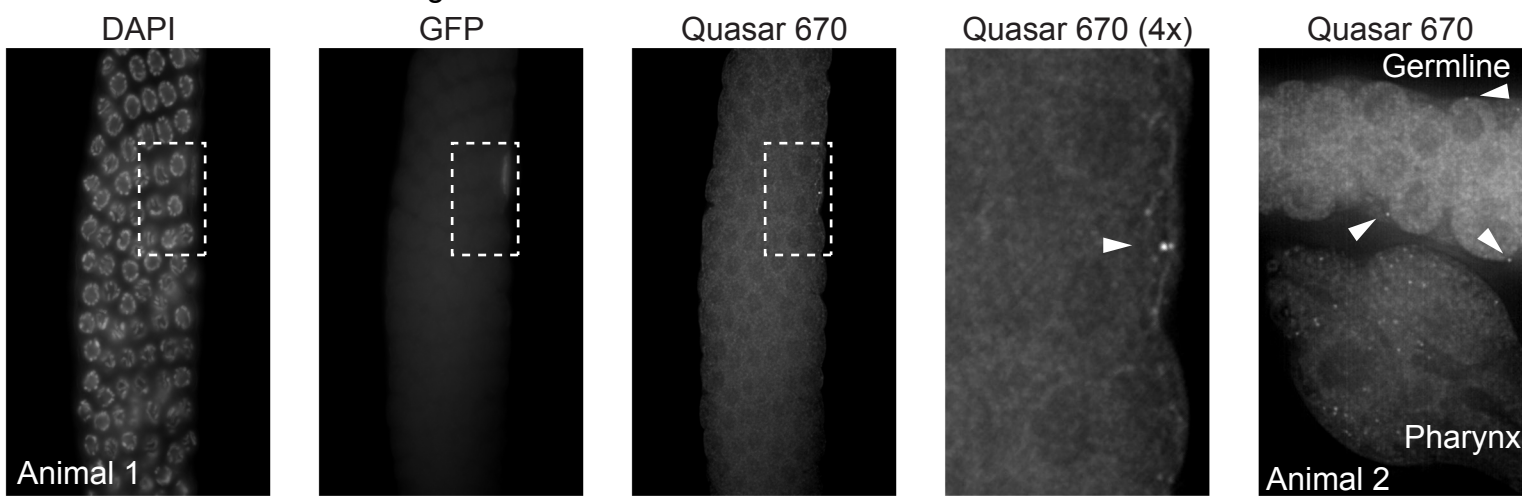

**C** N2

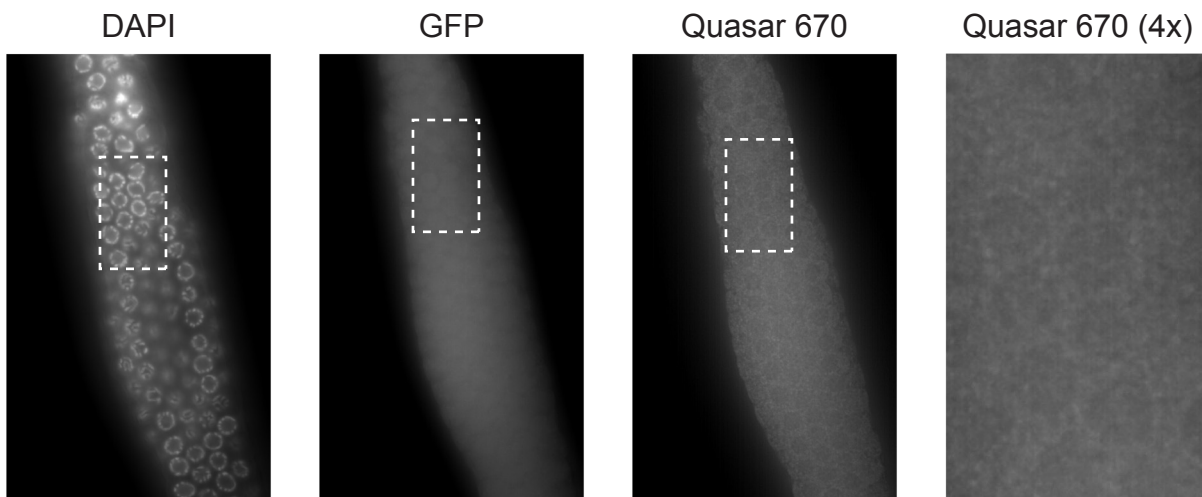

**D** PD1540 - rare smFISH spots

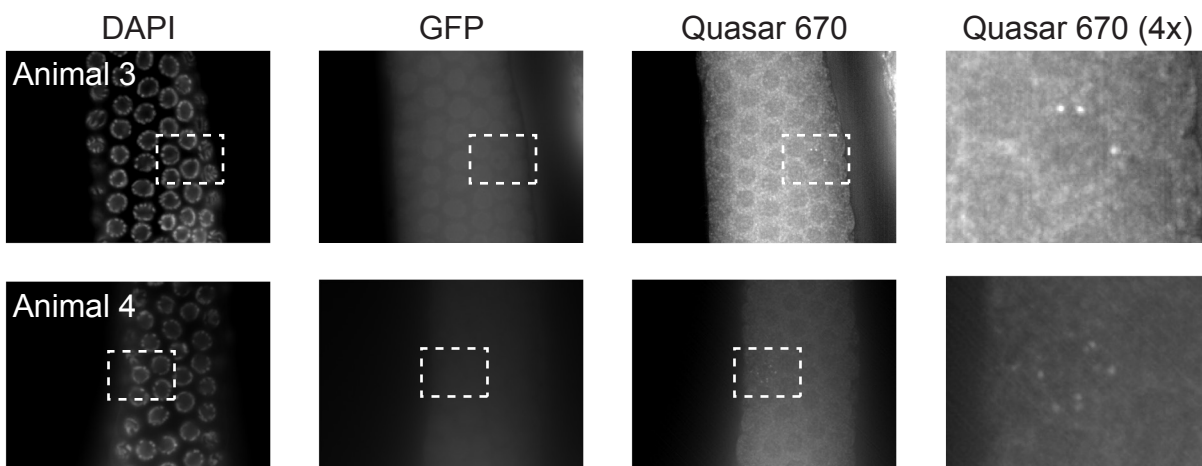

Supplement: NIHMS792102-supplement-14.pdf [file NIHMS792102-supplement-14.pdf]

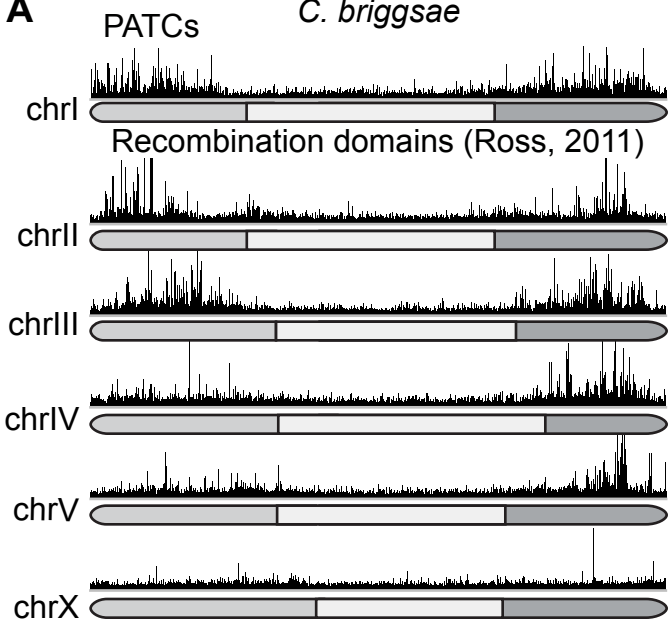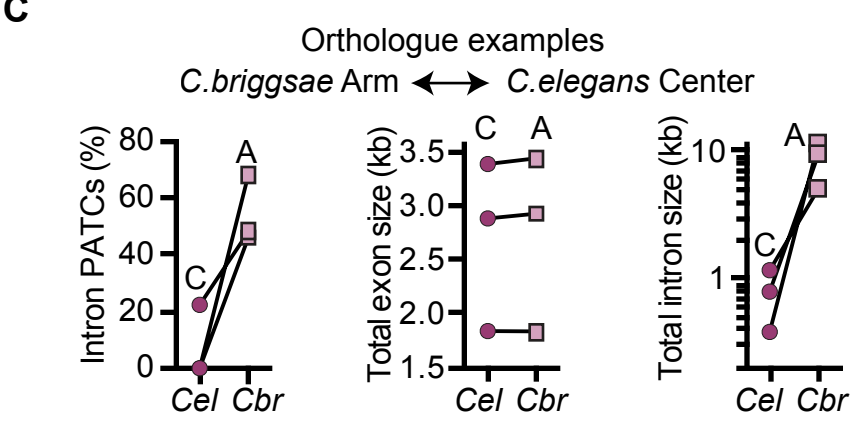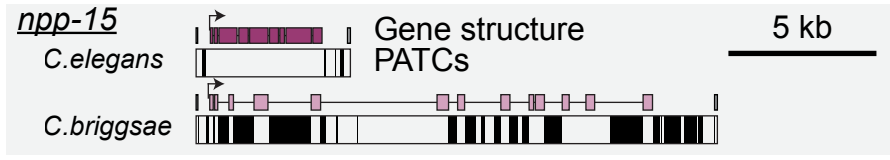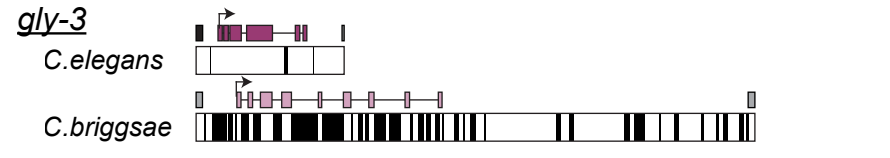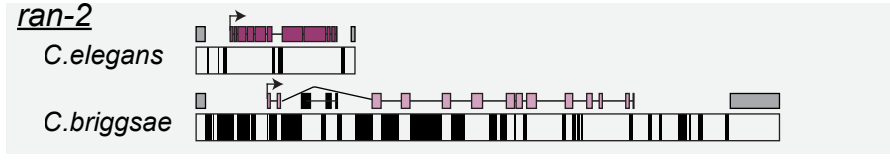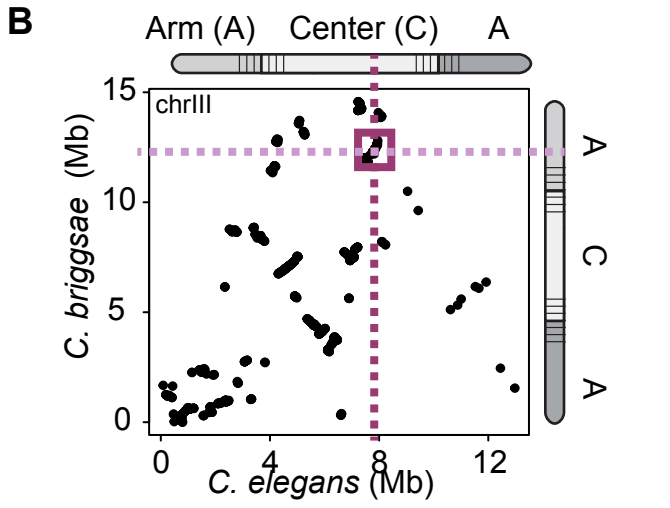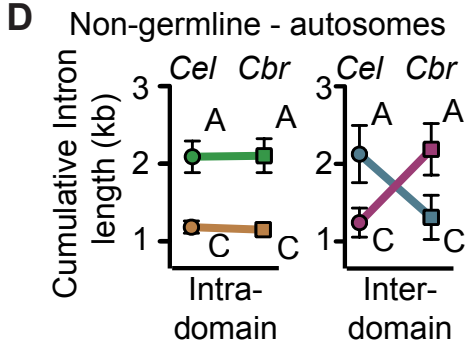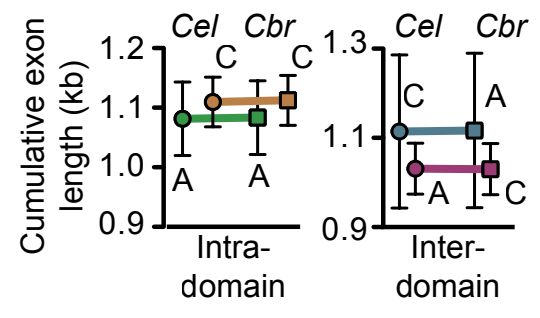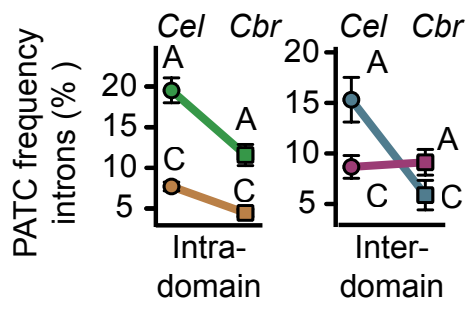

Supplement: NIHMS792102-supplement-15.pdf [file NIHMS792102-supplement-15.pdf]

Figure 1: Many *Pdpy-30*:GFP transgenes are specifically silenced in the germline

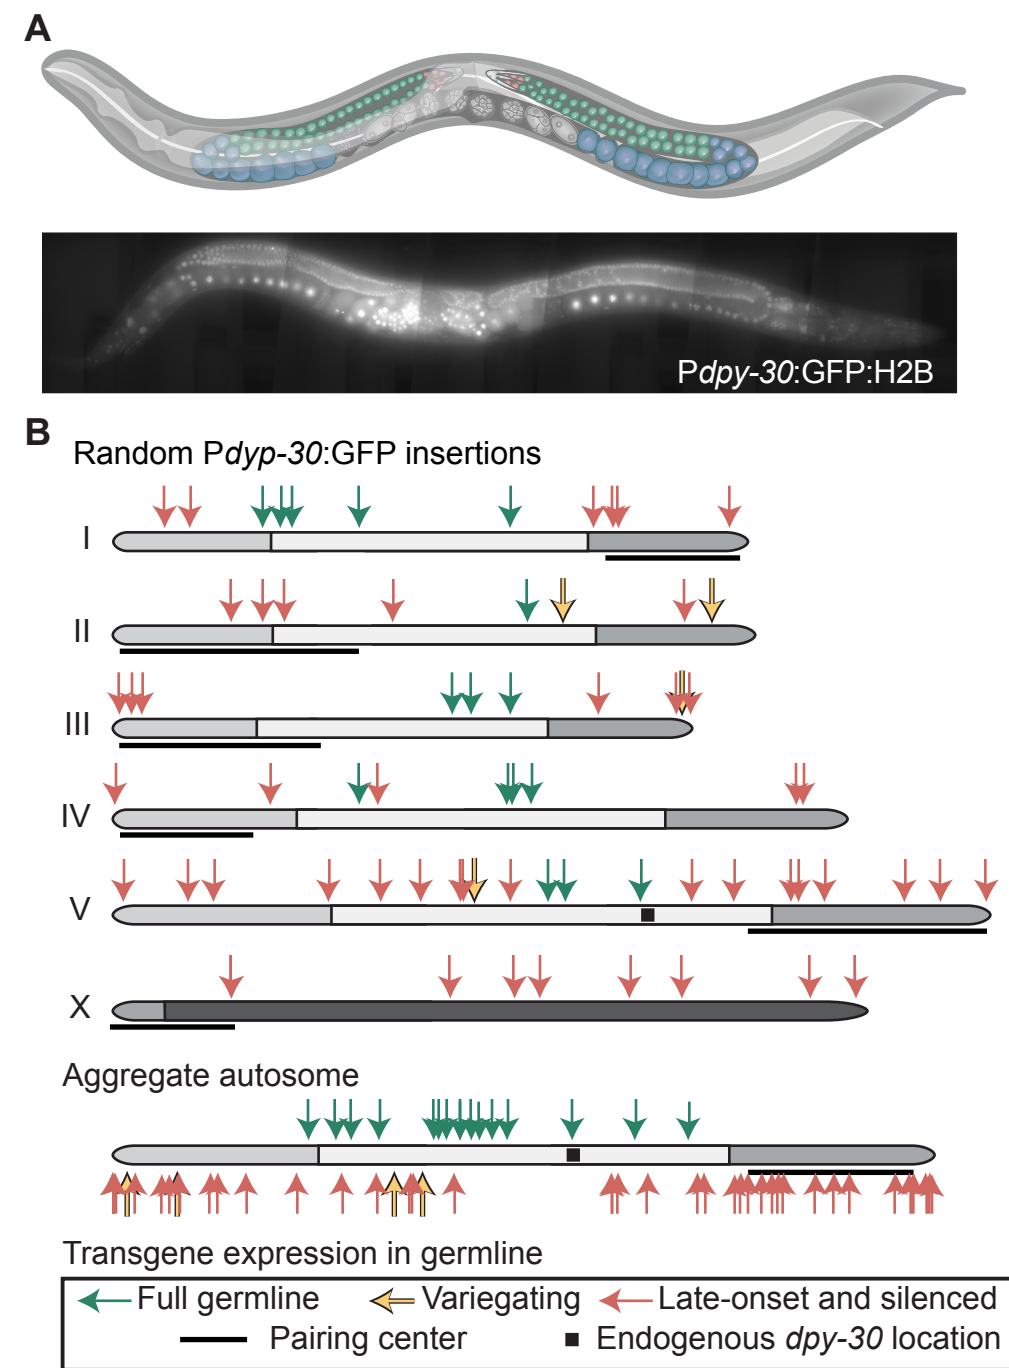

Supplement: NIHMS792102-supplement-4.pdf [file NIHMS792102-supplement-4.pdf]

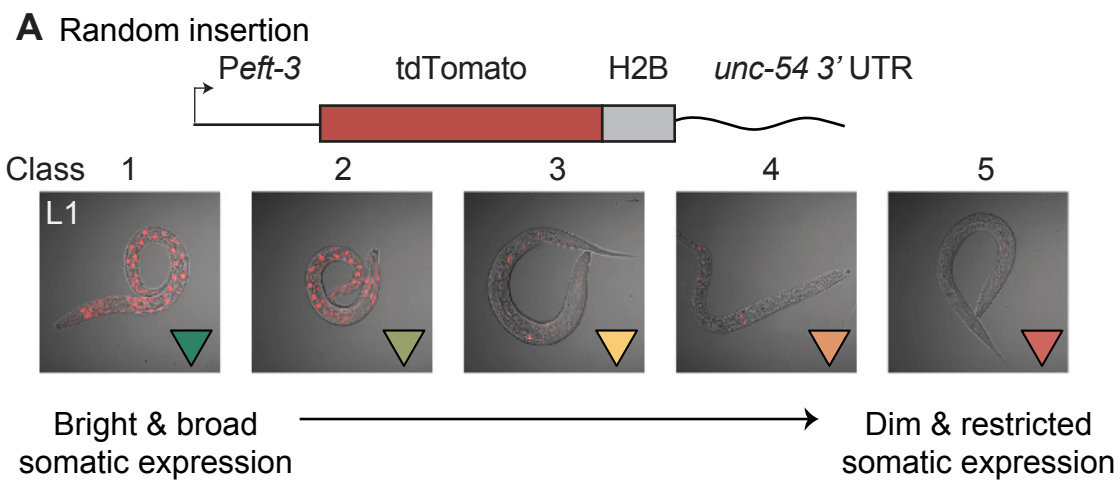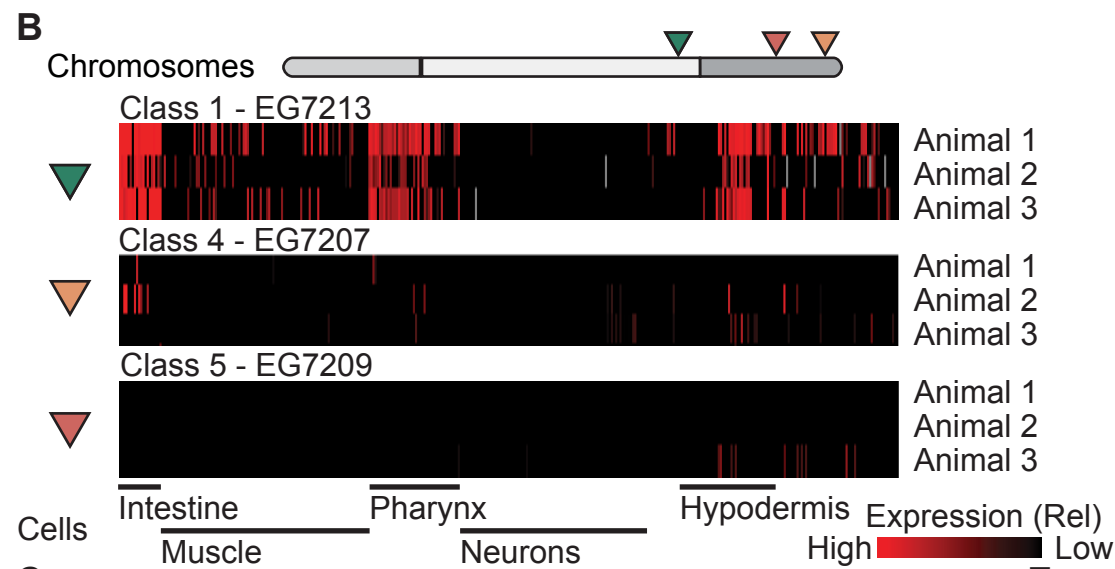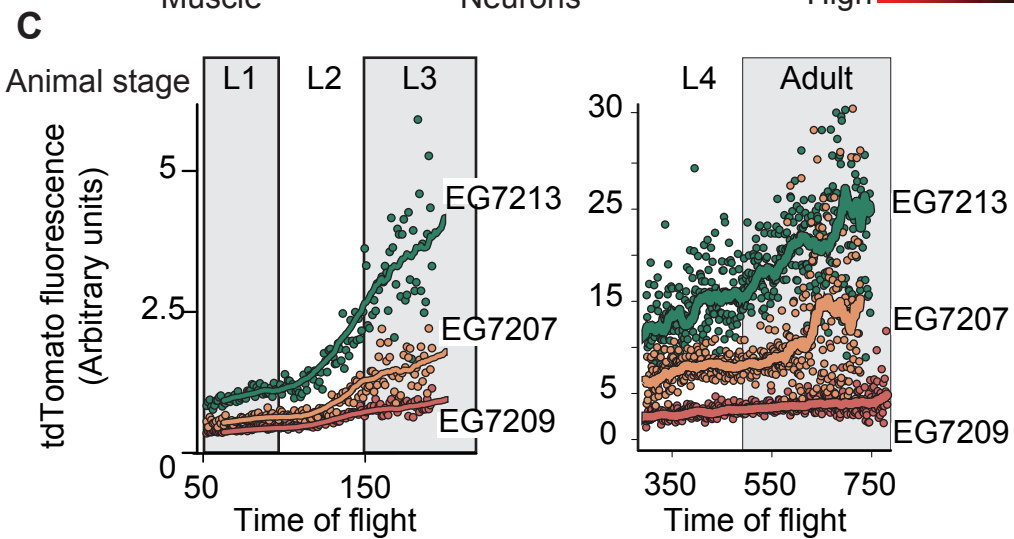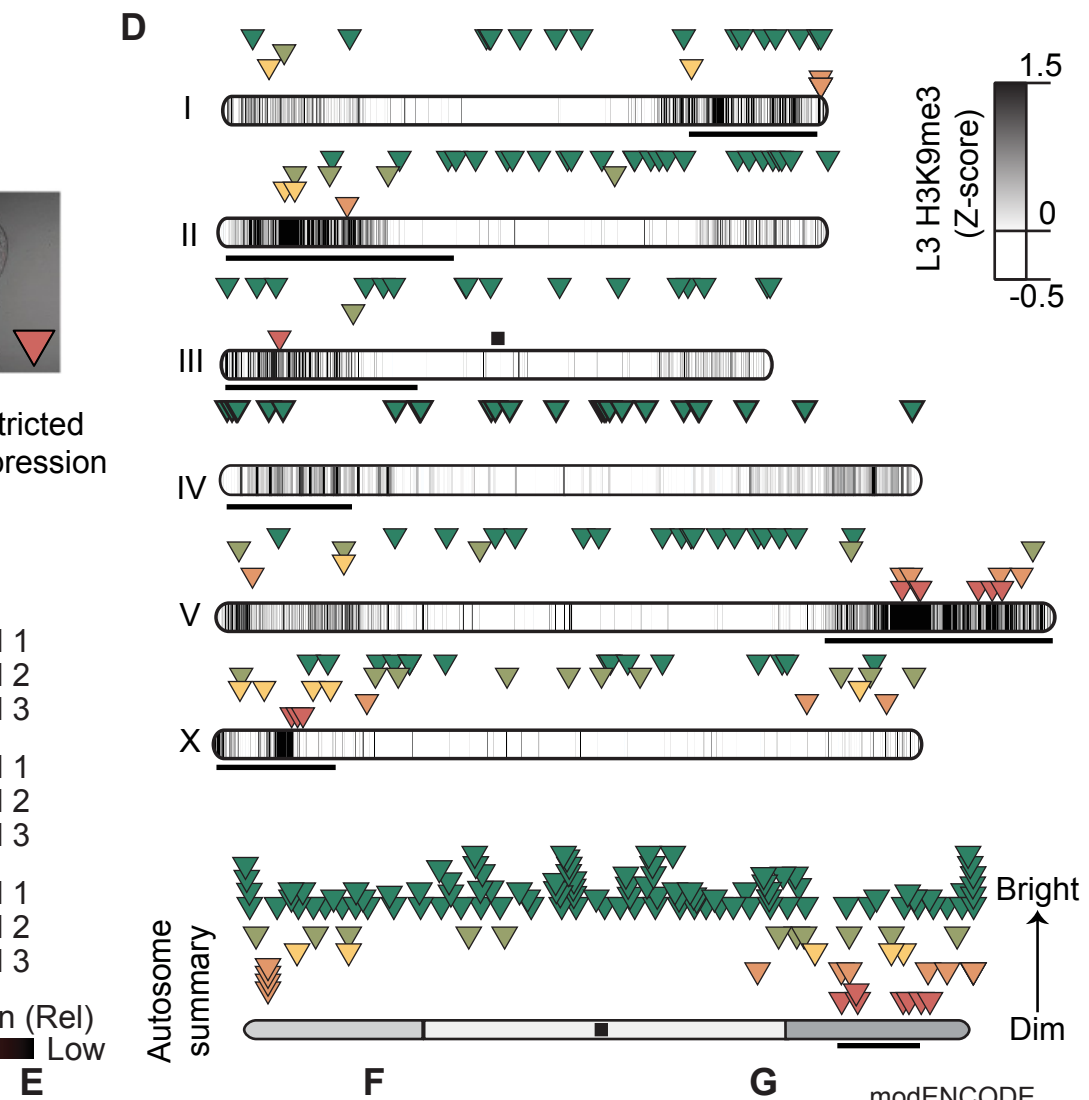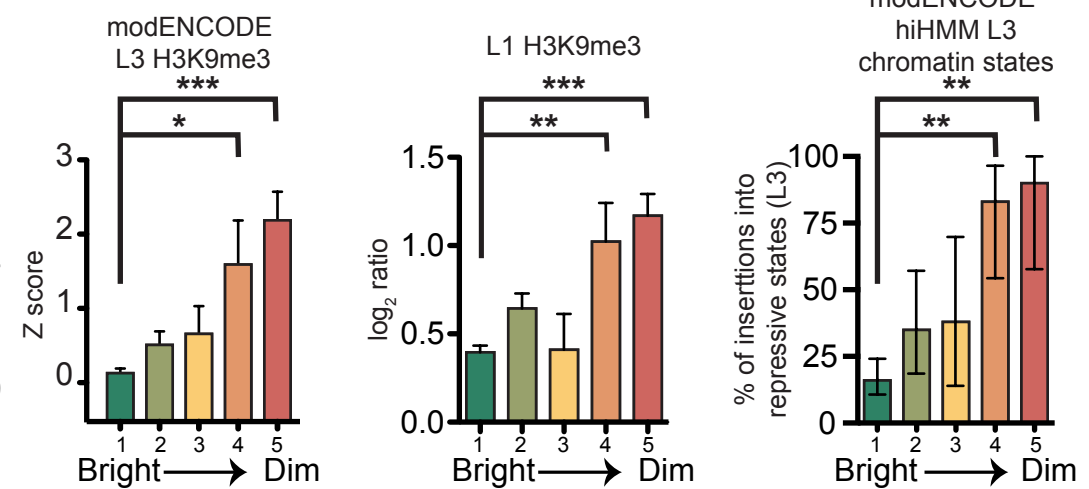

Supplement: NIHMS792102-supplement-5.pdf [file NIHMS792102-supplement-5.pdf]

Figure 4: PATCs in GFP introns reduce germline silencing

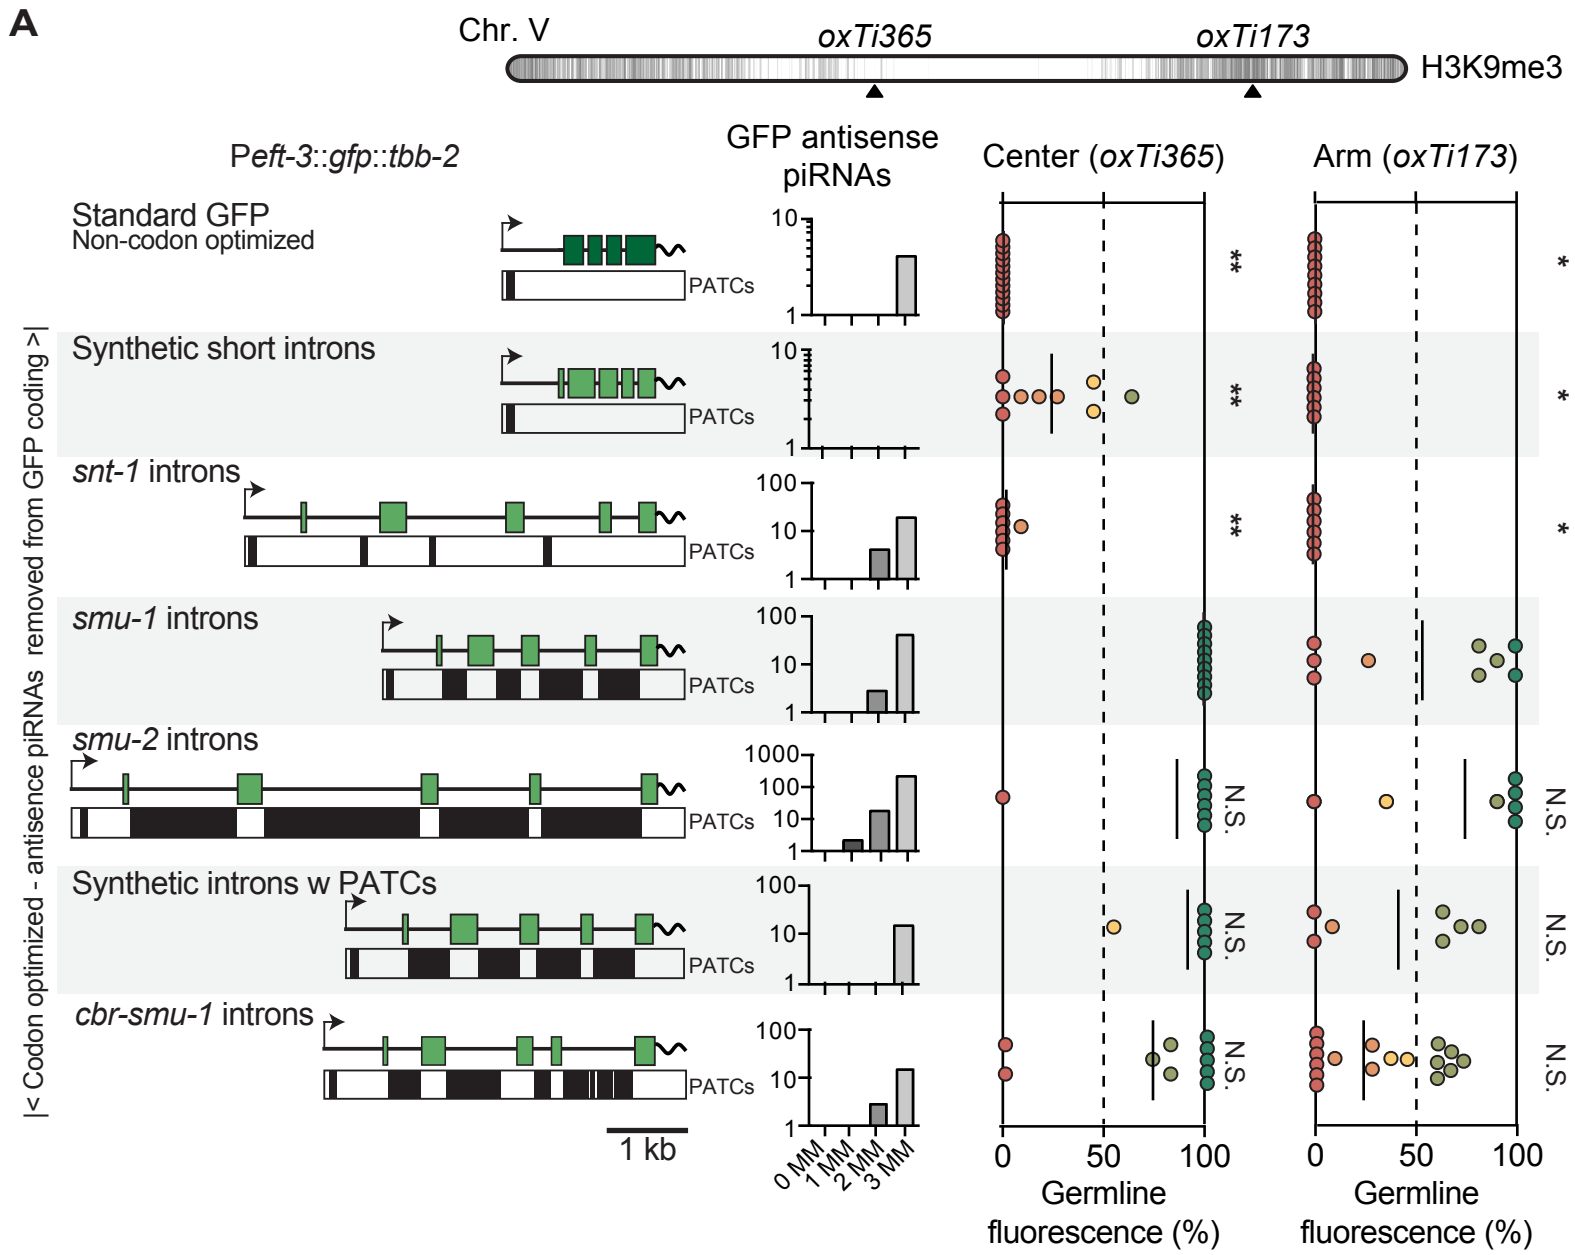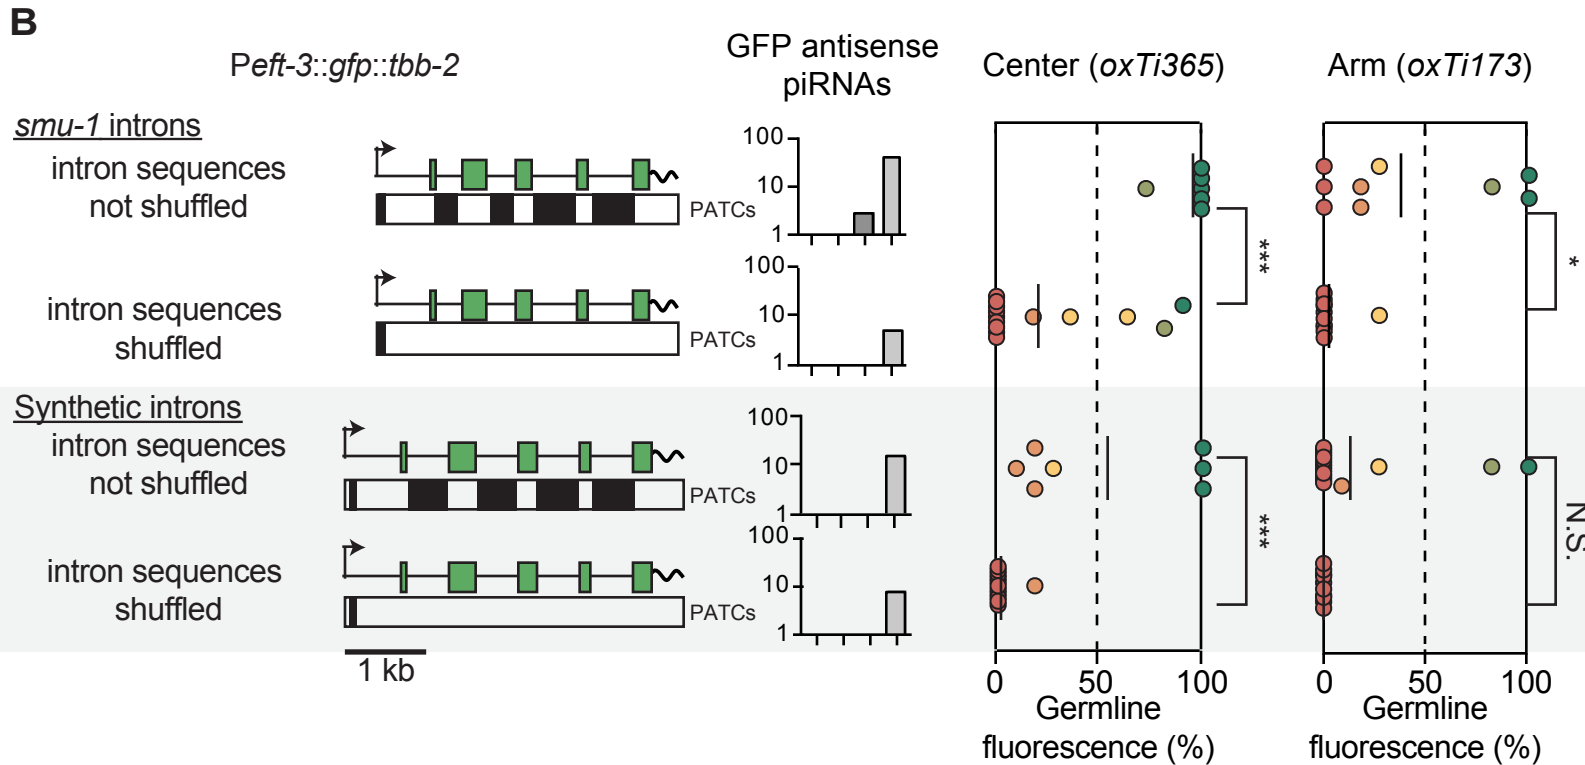

Supplement: NIHMS792102-supplement-7.pdf [file NIHMS792102-supplement-7.pdf]

**A** *Peft-3*:GFP:*tbb-2* 3'UTR insertions (arm)

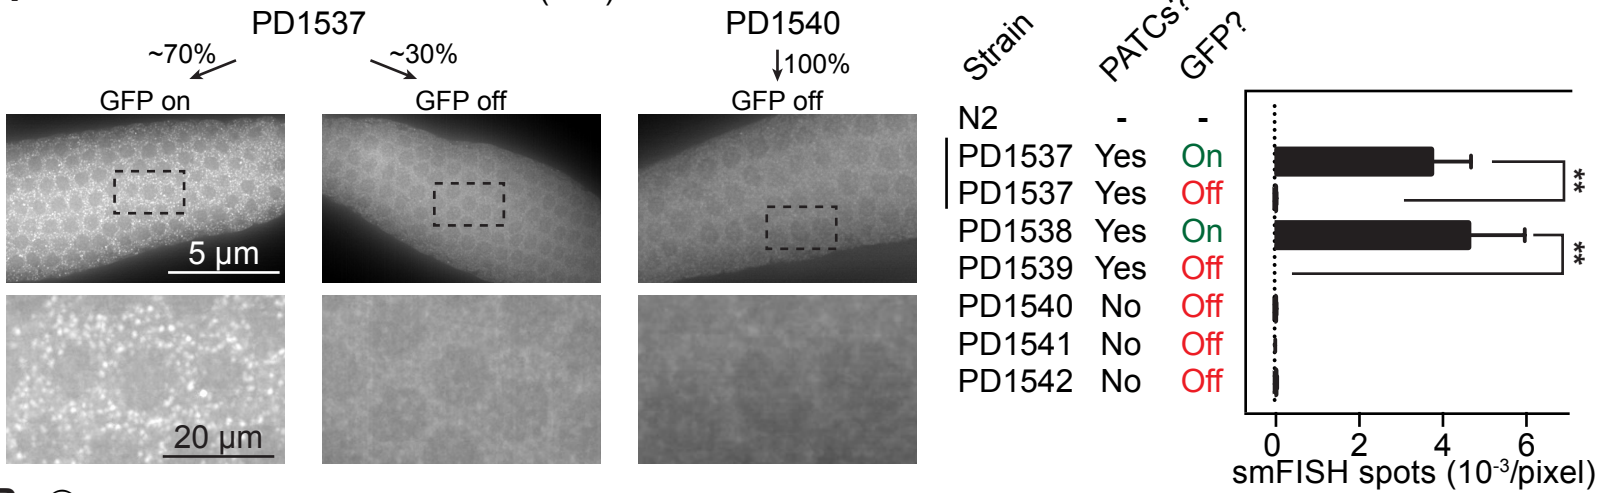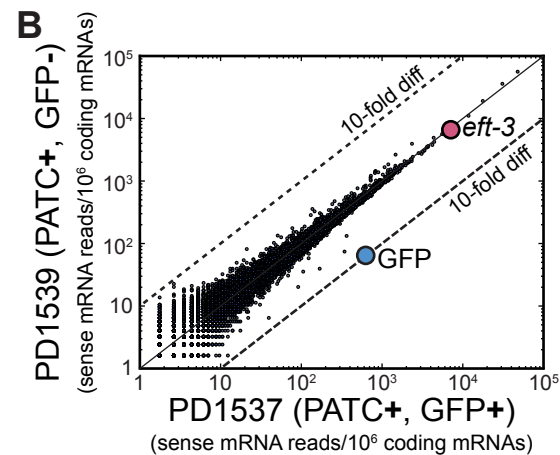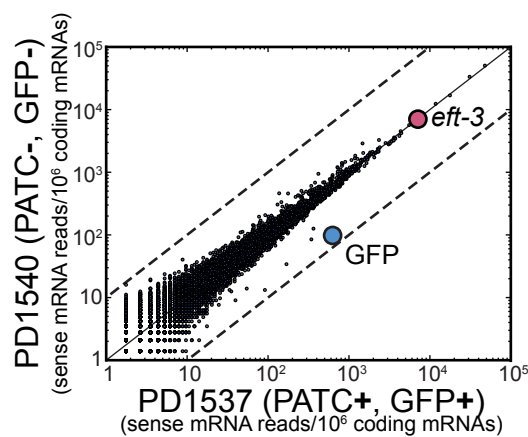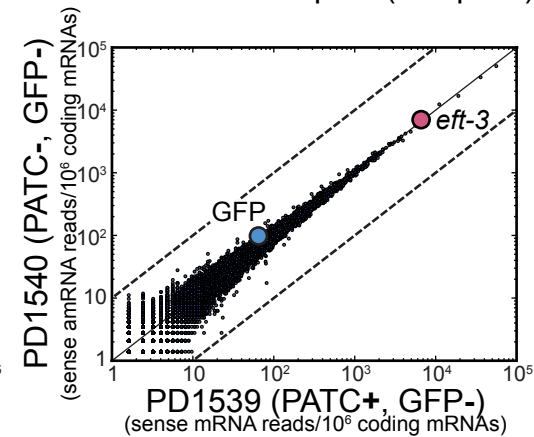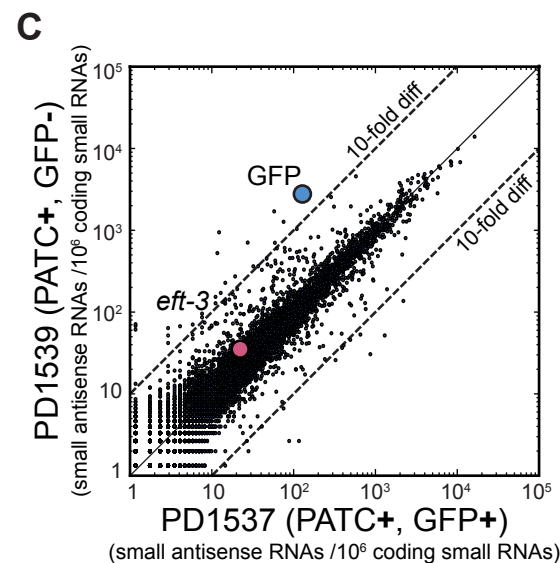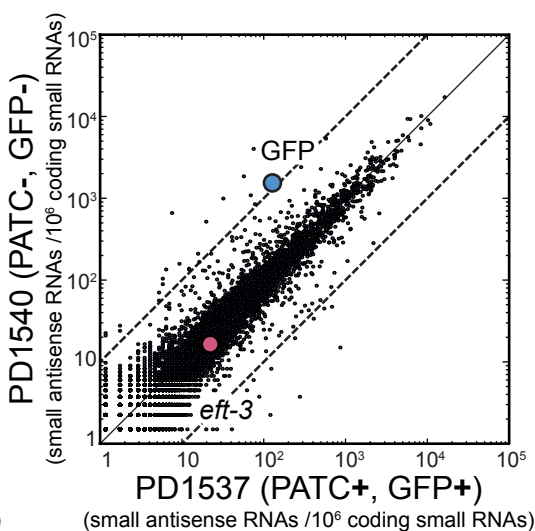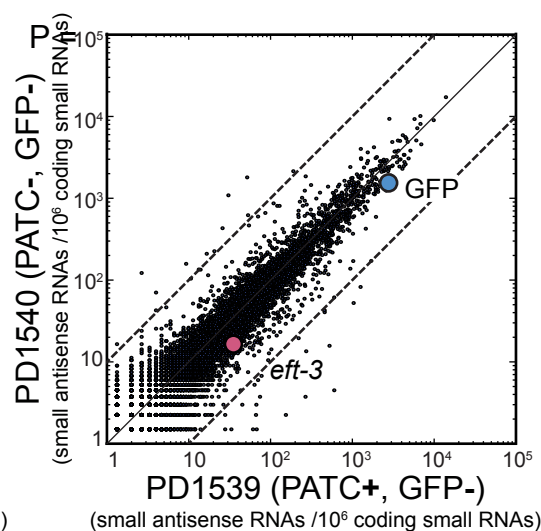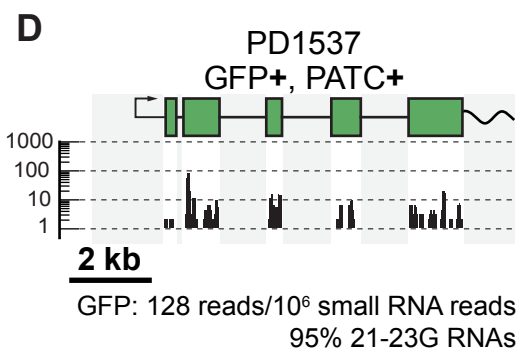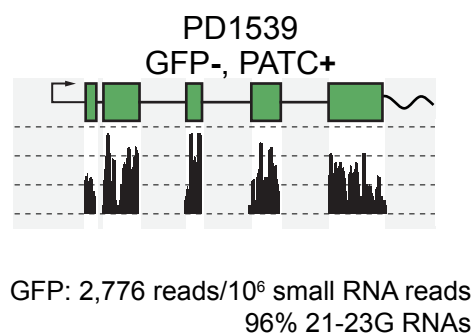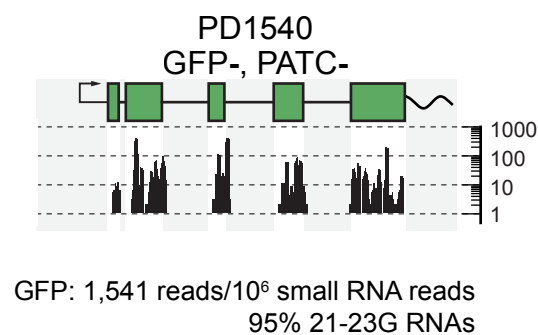

Supplement: NIHMS792102-supplement-8.pdf [file NIHMS792102-supplement-8.pdf]

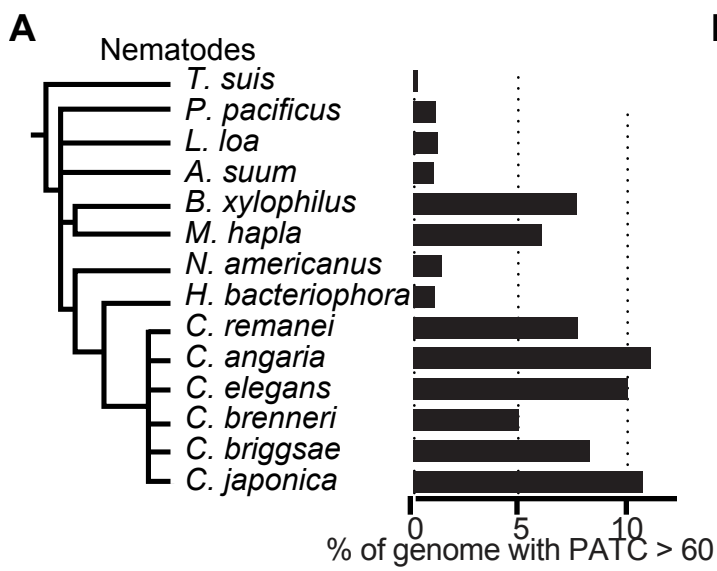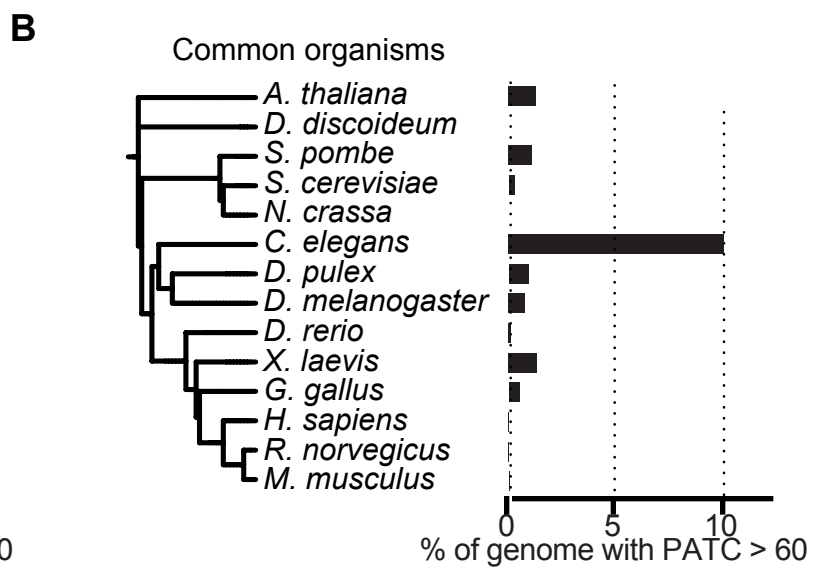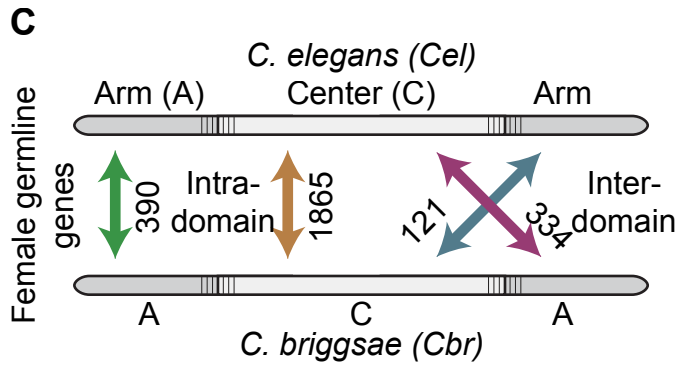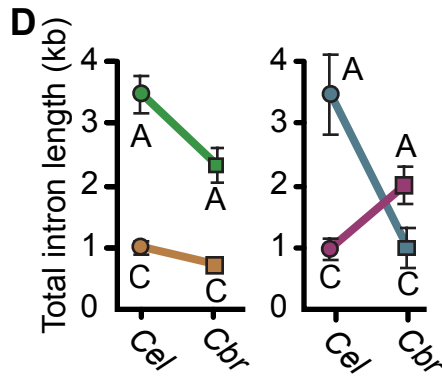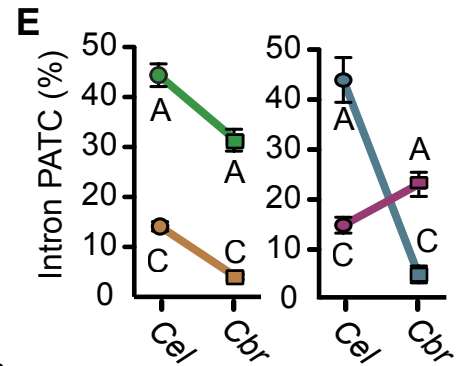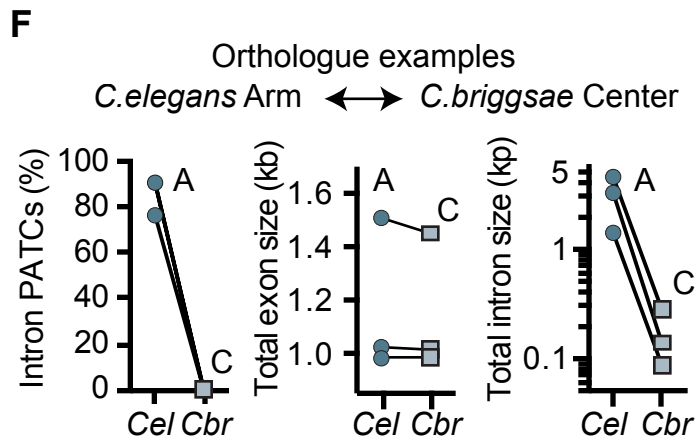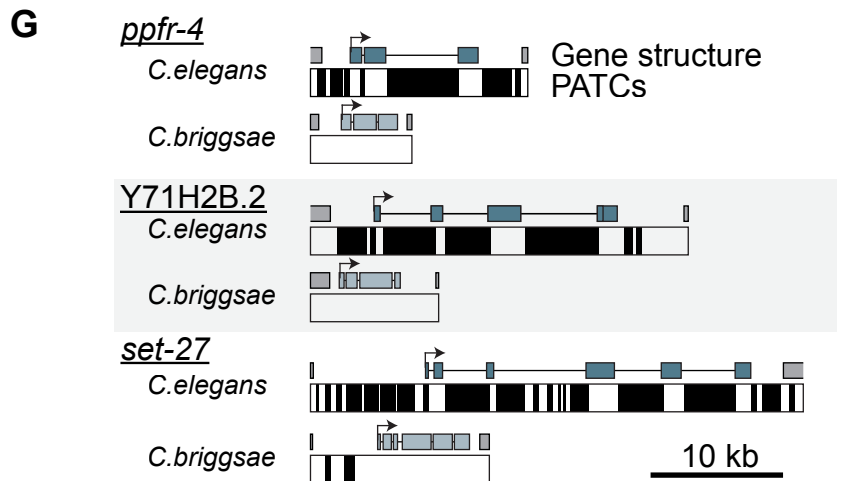

Supplement: NIHMS792102-supplement-9.pdf [file NIHMS792102-supplement-9.pdf]
